1 **Title:** Brown rat demography reveals pre-commensal structure in eastern Asia prior to expansion  
2 into Southeast Asia

3

4 **Authors:** Emily E. Puckett<sup>1,2</sup> and Jason Munshi-South<sup>1</sup>

5 <sup>1</sup>- Louis Calder Center, Fordham University, Armonk, NY 10504

6 <sup>2</sup>- Department of Biological Sciences, University of Memphis, Memphis, TN 38152

7

8 **Corresponding Authors:**

9 Emily E. Puckett

10 3770 Walker Avenue, Ellington Hall, Department of Biological Sciences, University of

11 Memphis, Memphis, TN 38152

12 Phone: 901-678-3005

13 Email: [Emily.E.Puckett@gmail.com](mailto:Emily.E.Puckett@gmail.com)

14 and

15 Jason Munshi-South

16 31 Whipporwill Road, Louis Calder Center- Biological Field Station, Fordham University

17 Armonk, NY 10504

18 Phone: 914-273-3078 ext 20

19 Email: [jmunshisouth@fordham.edu](mailto:jmunshisouth@fordham.edu)

20

21 **Keywords:** demography, phylogeography, global invasive

22

23 **ABSTRACT**

24 Fossil evidence indicates that the globally-distributed brown rat (*Rattus norvegicus*) originated in  
25 northern China and Mongolia. Historical records report the human-mediated invasion of rats into  
26 Europe in the 1500s, followed by global spread due to European imperialist activity during  
27 the 1600s-1800s. We analyzed 14 genomes representing seven previously identified evolutionary  
28 clusters and tested alternative demographic models to infer patterns of range expansion,  
29 divergence times, and changes in effective population ( $N_e$ ) size for this globally important pest  
30 species. We observed three range expansions from the ancestral population that produced the  
31 Pacific (~4.8kya), eastern China (diverged ~0.55kya), and Southeast (SE) Asia (~0.53kya)  
32 lineages. Our model shows a rapid range expansion from SE Asia into the Middle East then  
33 continued expansion into central Europe 537 years ago (1478 AD). We observed declining  $N_e$   
34 within all brown rat lineages from 150-1kya, reflecting population contractions during glacial  
35 cycles.  $N_e$  increased since 1kya in Asian and European, but not Pacific, evolutionary clusters.  
36 Our results support the hypothesis that northern Asia was the ancestral range for brown rats. We  
37 suggest that southward human migration across China between 800-1550s AD resulted in the  
38 introduction of rats to SE Asia, from which they rapidly expanded via existing maritime trade  
39 routes. Finally, we discovered that North America was colonized separately on both the Atlantic  
40 and Pacific seaboards, yet by evolutionary clusters of vastly different ages and genomic diversity  
41 levels. Our results should stimulate discussions among historians and zooarcheologists regarding  
42 the relationship between humans and rats.

43

## 44 INTRODUCTION

45 The genus *Rattus* originated and diversified in eastern and central Asia, and fossil evidence  
46 (Smith and Xie 2008) suggests northern China and Mongolia as the likely ancestral range of the  
47 cold-hardy brown rat (*Rattus norvegicus*). Yet, their contemporary distribution includes every  
48 continent except Antarctica. As a human commensal, brown rats occupy urban and agricultural  
49 areas using food, water, and shelter provided by humans. Rats are one of the most destructive  
50 invasive mammals, as they spread zoonotic diseases to humans (Himsworth et al. 2013), damage  
51 food supplies and infrastructure (Pimentel et al. 2000), and contribute to the extinction of native  
52 wildlife (Harper and Bunbury 2015). As an invasive species, brown rats outcompete native  
53 species for resources and are a primary target of eradication efforts (Jones et al. 2016). Brown  
54 rats have been domesticated as models for biomedical research with inbreeding leading to  
55 disease phenotypes similar to humans (Atanur et al. 2013). Finally, they are a nascent model to  
56 study evolution within urban landscapes, as they likely experience multiple selection pressures  
57 given their global distribution across a range of habitats and climates (Johnson and Munshi-  
58 South 2017).

59  
60 The historical record indicates that rats colonized Europe in the early 1500s, eastern North  
61 America by the 1750s, and the Aleutian Archipelago by the 1780s (Black 1983; Armitage 1993).  
62 These historic records provide independent estimates for assessing inferences from demographic  
63 models utilizing genomic data. Few other species have archeological or written human records  
64 that can be used to corroborate genomic inferences, although house mouse, domestic dogs, and  
65 livestock are notable exceptions. Thus, we paired these data sources to test how well

66 demographic models of a rapid and recent global expansion match historic records on rat

67 invasions.

68

69 Research into the global expansion of brown rats has focused on both the routes and timings of

70 different invasions; questions of specific interest include the location of the ancestral range, and

71 when rats arrived in Europe. Black rats (*R. rattus*) reached southern Europe by 6kya (Ervynck

72 2002) and Great Britain by the 300s AD (Yalden 2003), yet brown rats were not recorded in

73 Europe until the 1500s AD. These dates imply vastly different phylogeographic histories for

74 these two commensal rats, likely related to where they speciated within Asia: black rats on the

75 Indian subcontinent and brown rats in the northern steppe. Previous phylogeographic studies of

76 brown rats using mitochondrial DNA identified China as the ancestral range based on private

77 haplotypes and ancestral state reconstructions, with multiple expansions into Southeast (SE)

78 Asia, Europe, and North America (Lack et al. 2013; Song et al. 2014; Puckett et al. 2018).

79 Inference from mitochondria has been limited due to high haplotype diversity observed from

80 locally intense but globally diffuse sampling strategies. Thus, key geographic regions especially

81 around the Indian Ocean basin and the Middle East are unrepresented in current datasets;

82 sampling these areas would allow us to distinguish clinal versus long-distance expansions, where

83 multiple introductions occurred, and mito-nuclear discordance. A phylogeographic analysis

84 using nuclear SNPs inferred hierarchical clustering along five range expansion routes (Puckett et

85 al. 2016). From the putative ancestral range, brown rats expanded southward into SE Asia and

86 eastward into China and Russia (Puckett et al. 2016). The eastward expansion extended to North

87 America with two independent colonizations of the Aleutian Archipelago and sites along the

88 Pacific coast of western North America. From SE Asia rats expanded into Europe (Puckett et al.

89 2016) via the Middle East (Zeng et al. 2018), where the likely route was aboard ships conducting  
90 maritime trade across the Indian Ocean into the Red Sea and Persian Gulf before moving goods  
91 onto land. Although these trade routes were established by the 200s BC, they intensified in the  
92 1400-1500s AD (Tucker 2015). The fifth range expansion moved rats to eastern North America,  
93 the Caribbean, South America, western Africa, and Australasia during the age of European  
94 imperialism of the 1600-1800s (Puckett et al. 2016) with the result that genetic diversity is  
95 similar across the Western hemisphere and in western Europe. Ultimately, our previous work  
96 inferred the following seven genomic clusters: *Eastern China*, *SE Asia*, *Aleutian*, *Western North*  
97 *America*, *Northern Europe*, *Western Europe*, and (*Western Europe*) *Expansion*. However, these  
98 range expansions were inferred from patterns of population clustering and not specific models  
99 that estimate the population tree topology or demographic parameters of the evolutionary  
100 lineages. Thus, we generated 10 whole genome sequences (WGS) to represent the previously  
101 identified clusters to infer the demographic history of brown rats. We pay particular attention to  
102 both divergence times and changes in effective population sizes ( $N_e$ ) in relation to climatic  
103 changes and human history that may have influenced natural and human-mediated range  
104 expansions for this species.

105

## 106 **RESULTS**

107 We sequenced two genomes each from *SE Asia*, *Northern Europe*, *Western Europe*, and the  
108 *Western Europe-Expansion* (hereafter- *Expansion*) evolutionary clusters, and one genome each  
109 from the *Aleutian* and *Western North America* clusters (NCBI SRA PRJNA344413; Table S1).  
110 Average sequencing depth was 28.2X (range 24-38X). We estimated heterozygosity for each  
111 individual on the 20 autosomes separately. Samples from *Eastern China* had the highest average

112 chromosomal heterozygosity (0.244) where the *Aleutians* and *Western North America* had the  
113 lowest heterozygosity (0.143 and 0.148, respectively; Figure S1).

114

### 115 *Geographic origins of range expansions*

116 We estimated the directionality index ( $\psi$ ) (Peter and Slatkin 2013) which measures asymmetries  
117 between pairwise SFS from 45 global sampling sites genotyped at 32k SNPs to identify the  
118 geographic origins and directionality of the different range expansions. We first tested the  
119 expansion across Asia and observed that northern sites served as source populations for  
120 southward range expansions across the continent (Figure 1A). When we compared SE Asia and  
121 the Middle East, we observed that both regions served as source and sink populations, although  
122 Z-scores were greater moving from the Middle East to SE Asia (Figure 1B). Given potential  
123 connectivity between central Asia and the Middle East, this region requires better sampling to  
124 fully describe the regional relationships. The Middle East clearly served as a source of brown  
125 rats moving into central Europe, then dispersing across the continent into the Iberian Peninsula,  
126 Fennoscandia, and Great Britain (Figure 1C). Since our previous work suggested two expansions  
127 into North America, we analyzed the eastern and western seaboard separately. Eastern North  
128 America showed a strong signature of expansion from Western Europe (Figure 1D) as expected  
129 based on patterns of genomic clustering. Surprisingly, the eastern North America to western  
130 North America signatures from genomic clustering analyses (Puckett et al. 2016) were not  
131 observed in the directionality index data. Finally, we observed expansion from Russia (i.e.  
132 eastern Asia) to both the Aleutian Archipelago and San Diego, USA (*Western North America*  
133 cluster; Figure 1E).

134

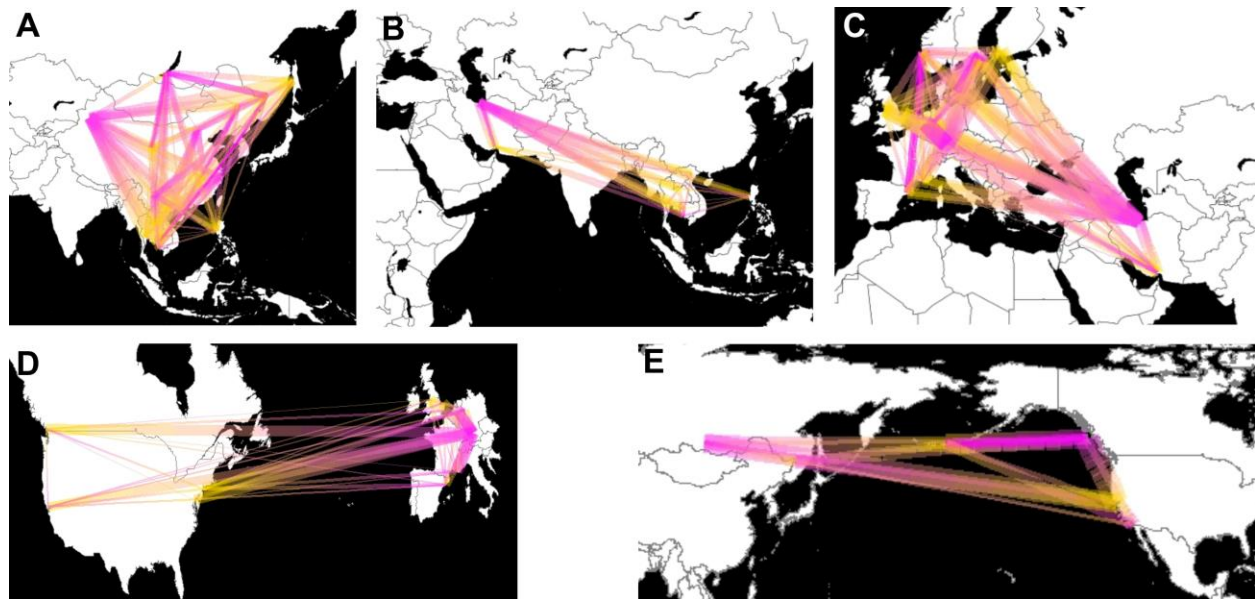

135

136 **Figure 1-** Estimates of regional (A: eastern Asia; B: SE Asia and the Middle East; C: Europe; D:  
137 western Europe and the Expansion range, and E: Russia, the Aleutian Archipelago, and Western  
138 North America) brown rat range expansions based on pairwise  $\psi$  statistics. Lines show  
139 directionality from inferred source (pink) to sink (yellow) populations, where thickness was  
140 scaled to the Z-score when the absolute value was greater than 5.

141

#### 142 *Effective population size through time*

143 We inferred the change in  $N_e$  over time using the multiple sequentially Markovian coalescent  
144 (MSMC) model (Schiffels and Durbin 2014) and scaled the estimates to years and  $N_e$  using the  
145 estimated mutation rate ( $\mu$ ) from the coalescent modeling analysis (see below) of  $9.34 \times 10^{-8}$  and 3  
146 generations per year. (As Deinum *et al.* (2015) estimated  $\mu$  of  $2.96 \times 10^{-9}$  and the precise  
147 generation time for rats is unknown, we present alternative estimates of the MSMC model in  
148 Figure S2.) We observed two distinct patterns in the MSMC results related to the Pacific  
149 (*Aleutian* and *Western North America*) and all other clusters. The Pacific clusters declined  
150 sharply in  $N_e$  beginning approximately 50kya (Figure 2). MSMC is not accurate in its last two  
151 time periods, therefore we present  $N_e$  of the third time lag which was approximately 200 years

152 ago and estimated at 1,460 and 1,550 effective individuals respectively in the *Aleutian* and  
153 *Western North America* clusters (Figure 2).

154

155 The second pattern was concordant between *Eastern China*, *SE Asia*, *Northern Europe*, *Western*  
156 *Europe*, and *Expansion* clusters.  $N_e$  steadily declined from approximately 150 – 1kya before  
157 increasing in the most recent time periods (Figure 2). Approximately 200 years ago (the first  
158 reliable time step),  $N_e$  was: 13,000 in *Eastern China*, 38,000 in *SE Asia*, 47,000 in *Northern*  
159 *Europe*, 29,000 in *Western Europe*, and 26,000 in *Expansion* (Figure 2).

160

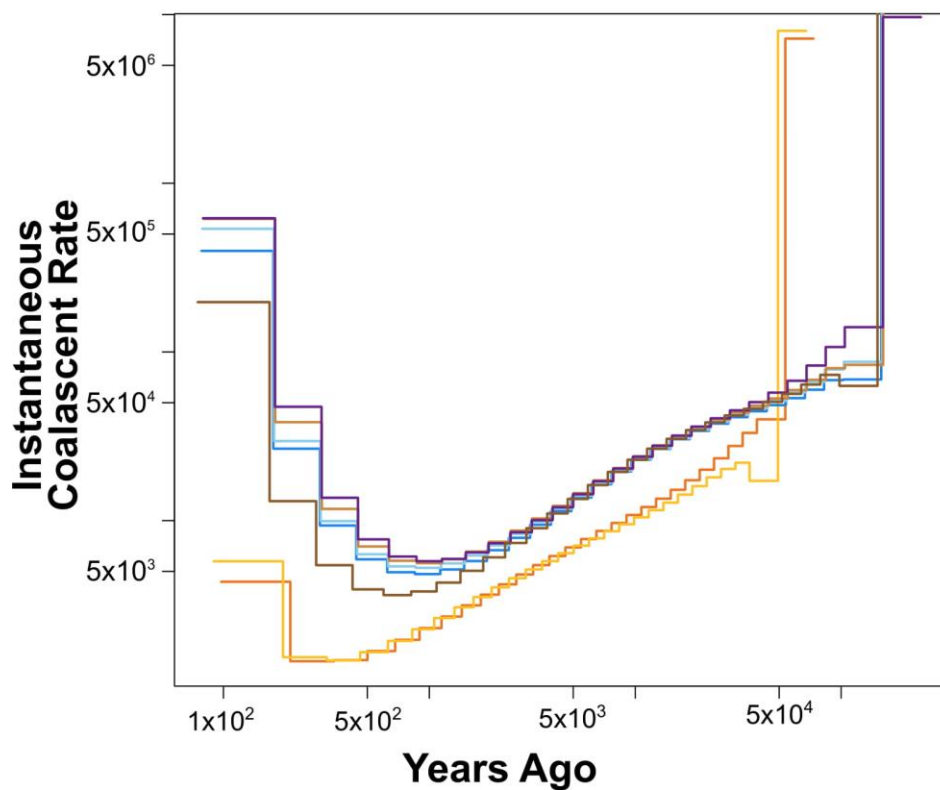

161

162 **Figure 2-** Plot of change in the instantaneous coalescent rate over time using MSMC where the  
163 x-axis is years before the present. Each evolutionary cluster was represented by a different color:  
164 *eastern China*- dark brown; *SE Asia*- light brown; *Aleutian*- orange; *Western North America*-  
165 yellow; *Northern Europe*- purple; *Western Europe*- light blue; and *Expansion*- medium blue.

166



167 *Demographic model*

168 Based on previous work on the hierarchical genetic clustering of brown rats (Puckett et al. 2016)  
169 and the range expansion results, we split the range into Asian and European derived clusters and  
170 inferred that SE Asia linked the two regions. Thus, we built our full demographic model by  
171 conducting model selection in two stages where we first identified the models that best  
172 represented divergence patterns in Asia (Figure S3) and Europe (Figure S4) separately, then  
173 combined those tree topologies into a global model for parameter estimation. The best Asian  
174 model had an ancestral unsampled population with independent divergence events for *Eastern*  
175 *China*, *SE Asia*, and the “Pacific” cluster that diverged into the *Aleutians* and *Western North*  
176 *America* (Figure S3). For the European model, the best supported model used *SE Asia* as the  
177 ancestral population then inferred a series of divergences first into the Middle East then *Western*  
178 *Europe*, followed by independent divergences of *Northern Europe* and the *Expansion* from  
179 *Western Europe* (Figure S4).

180

181 Using WGS data from 14 genomes, we modeled the nine-population topology inferred from the  
182 sub-models (Figure 3). We ran five models varying the rate parameters that allowed growth or  
183 contraction of  $N_e$  over time given our MSMC estimates (Figure 2), and observed that the best-  
184 supported model included decreasing ancestral population size and increasing size since the start  
185 of the range expansions (Appendix 1). We estimated that *Eastern China* diverged from the  
186 ancestral population 554 years ago (90% highest density probably [HPD]: 513 - 8666 years;  
187 Table 1). The Pacific cluster diverged from the ancestral population 4.8kya (HPD: 3.1 –  
188 12.3kya), then the *Aleutians* and *Western North America* diverged 2.6kya (HPD: 1.0 – 9.1kya).  
189 The divergence that led to the global expansion of rats occurred rapidly, where rats first

190 expanded into *SE Asia* 538 years ago (1477 AD; HPD: 1475-1745 AD). Our model also  
191 estimated 538 years (HPD: 1471-1741 AD) for the entry of rats the Middle East. We estimated  
192 rapid divergence of rats into Europe including the *Western Europe* divergence 537 years ago  
193 (1478 AD; HPD: 1472-1741 AD), and *Northern Europe* divergence 536 years ago (1479 AD;  
194 HPD: 1470-1739 AD). Finally, we estimated the *Expansion* cluster diverged 509 years ago (1494  
195 AD; HPD: 1487-1741 AD).

196  
197 We ran the cross-coalescence analysis within MSMC2 to estimate the rate of divergence between  
198 the seven clusters with high depth of coverage (i.e. excluding Iran). We observed that divergence  
199 was complete between both the *Aleutians* or *Western North America* and all other populations  
200 (Figure S5). The European clusters showed similar patterns of divergence with *Eastern China*  
201 with approximately 60% divergence complete (Figure S5A). Cross-coalescence between the  
202 *Aleutians* and *Western North America* increased approximately 200 generations ago before  
203 decreasing to 50% (Figure S5C). The four clusters making up the most recent expansions (*SE*  
204 *Asia*, *Northern Europe*, *Western Europe*, and *Expansion*) had signatures of increasing cross-  
205 coalescence over the past 1,000 generations (Figure S5 B, D-F). We believe that the rapid global  
206 range expansion resulted in high rates of coalescence events between instead of within  
207 evolutionary clusters that produced this signature in the analysis.

208

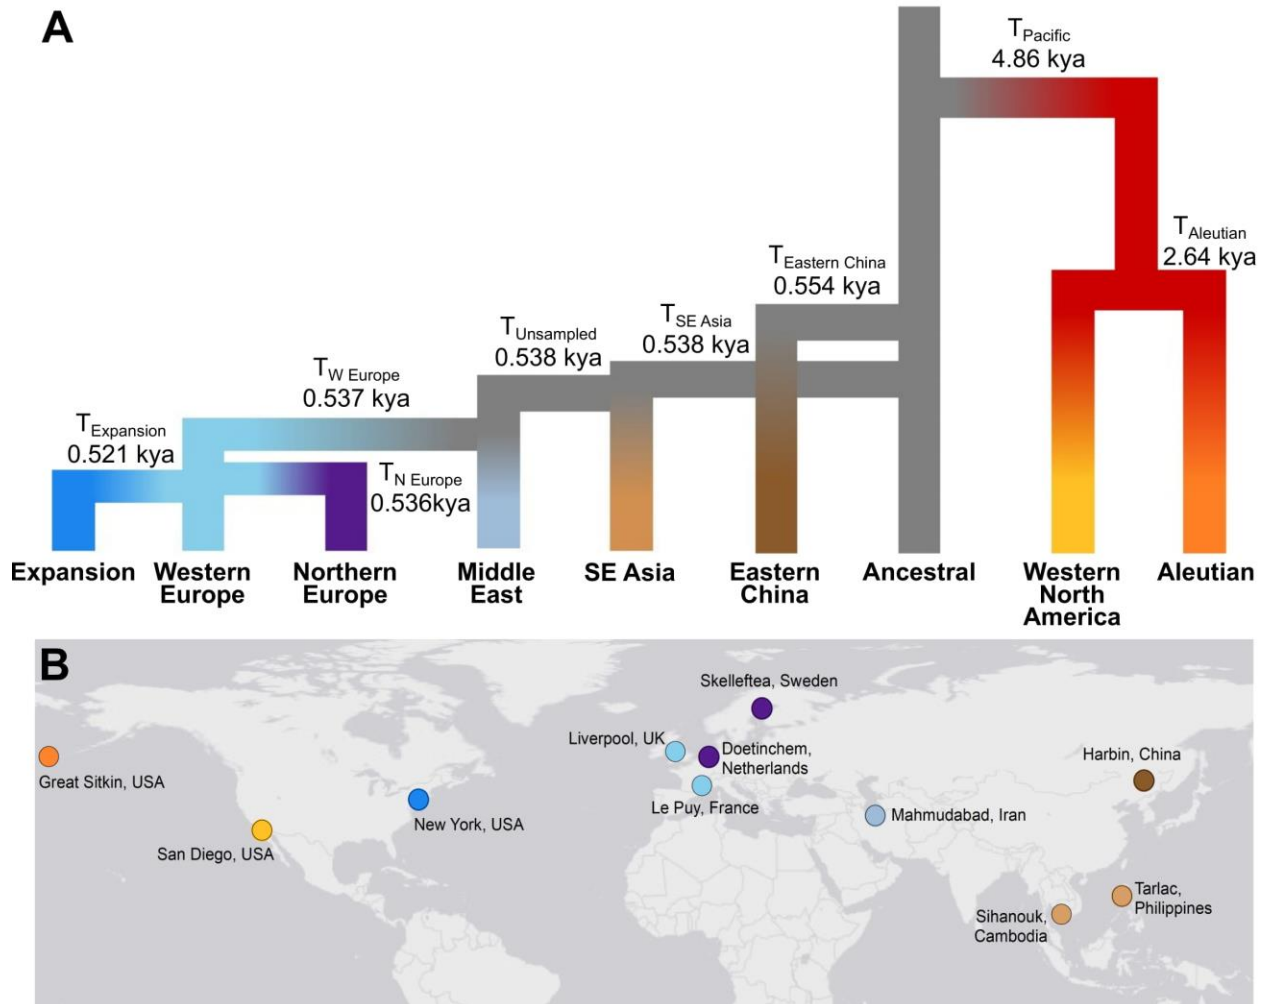

209

210 **Figure 3-** (A) The best supported demographic model contained nine evolutionary clusters  
211 inclusive of two unsampled populations. The divergence times in generations and  $N_e$  are listed in  
212 Table S4. (B) Map of global sampling locations for the WGS demographic model where  
213 evolutionary clusters were represented by different colors: *Eastern China*- dark brown; *SE Asia*-  
214 light brown; *Aleutian*- orange; *Western North America*- yellow; *Middle East*- grey-blue;  
215 *Northern Europe*- purple; *Western Europe*- light blue; and *Expansion*- medium blue.

216

217

218 **Table 1-** Parameter estimates from the best supported model of global brown rat demography for  
 219 eight evolutionary clusters and an unsampled ancestral populations using 14 whole genomes.  
 220 Both point and 90% highest density probability (HPD) estimates are presented for each model  
 221 parameter (N- population size, R- rate of population change, T- divergence time, and  $\mu$ - mutation  
 222 rate). See Appendixes 1 and 2 for model specifications and Figure 2A for population topology.  
 223

| Parameter                                     | Units                       | Estimate               | 90% HPD                        |
|-----------------------------------------------|-----------------------------|------------------------|--------------------------------|
| N <sub>Ancestral</sub>                        | 2N                          | 129714                 | 43297 - 231318                 |
| N <sub>Eastern China</sub>                    | 2N                          | 2096                   | 665 - 45667                    |
| N <sub>Aleutians</sub>                        | 2N                          | 34627                  | 8955 - 40705                   |
| N <sub>Western North America</sub>            | 2N                          | 22366                  | 5356 - 53122                   |
| N <sub>SE Asia</sub>                          | 2N                          | 1547                   | 448 - 1702                     |
| N <sub>Iran</sub>                             | 2N                          | 268                    | 158 - 635                      |
| N <sub>Western Europe</sub>                   | 2N                          | 854                    | 267 - 1314                     |
| N <sub>Northern Europe</sub>                  | 2N                          | 836                    | 259 - 1204                     |
| N <sub>Western Europe Expansion</sub>         | 2N                          | 423                    | 279 - 1019                     |
| R <sub>Ancestral</sub>                        |                             | $7.54 \times 10^{-2}$  | $0.07 - 1.68 \times 10^{-3}$   |
| R <sub>Pacific</sub>                          |                             | $2.53 \times 10^{-4}$  | $0.19 - 3.97 \times 10^{-4}$   |
| R <sub>Ghost</sub>                            |                             | $-1.84 \times 10^{-5}$ | $-9.17 - -0.03 \times 10^{-5}$ |
| R <sub>Eastern China</sub>                    |                             | $1.07 \times 10^{-4}$  | $-3.85 - -0.83 \times 10^{-3}$ |
| R <sub>Aleutians</sub>                        |                             | $-9.14 \times 10^{-4}$ | $-5.58 - -7.13 \times 10^{-4}$ |
| T <sub>Eastern China</sub>                    | gen                         | 1663                   | 1541 - 25999                   |
| T <sub>Pacific</sub>                          | gen                         | 14580                  | 9330 - 36987                   |
| T <sub>Aleutian - Western North America</sub> | gen                         | 7926                   | 3107 - 27317                   |
| T <sub>SE Asia</sub>                          | gen                         | 1615                   | 809 - 1618                     |
| T <sub>Iran</sub>                             | gen                         | 1613                   | 822 - 1630                     |
| T <sub>Western Europe</sub>                   | gen                         | 1612                   | 821 - 1629                     |
| T <sub>Northern Europe</sub>                  | gen                         | 1608                   | 828 - 1634                     |
| T <sub>Western Europe Expansion</sub>         | gen                         | 1563                   | 823 - 1584                     |
| $\mu$                                         | mutations gen <sup>-1</sup> | $9.34 \times 10^{-8}$  | $8.15 - 9.89 \times 10^{-8}$   |

224

225

226

227 *ddRAD Demographic Models*

228 We used a ddRAD-Seq dataset (Table S2) to further investigate regional population tree  
229 topologies to better understand patterns of global range expansion; below we detail the  
230 motivation and results for each analysis. We estimated divergence time of the two Pacific  
231 clusters at 2.6kya (Table 1) which was surprisingly old given the historic record that rats were  
232 introduced to the Aleutian Archipelago in 1780 AD. Thus, we estimated the population tree  
233 topology between eastern Asia and western North America (Figure S6). We observed that a  
234 model where eastern China and Russia were sister populations with an admixture pulse from  
235 Russia into Adak Island (*Aleutian* cluster) of 30% occurred 215 generations ago (1943 AD) was  
236 the best supported model. The estimated timing of this admixture pulse was younger than the  
237 historic record predicted.

238  
239 Our previous clustering results suggested that brown rats in the Philippines were diverged from  
240 other SE Asia countries, and that there may be gene flow between Thailand and Cambodia  
241 (Puckett et al. 2016); therefore, we modeled the population tree within SE Asia. We observed  
242 that the Philippines were well diverged from mainland populations, and that gene flow from  
243 Thailand into Cambodia was present (Figure S7). The population tree topology supported the  
244 geography where Cambodia and Vietnam were sister populations that shared an ancestor with  
245 Thailand (Figure S7).

246  
247 We split European populations between the *Western* and *Northern* evolutionary clusters and  
248 observed patterns concordant with geography; specifically, Norway and Sweden were sister  
249 populations and shared a common ancestor with the Netherlands on continental Europe (Figure

250 S8). Similarly, France and Spain on the Iberian Peninsula shared a common ancestor with Great  
251 Britain, an island nation (Figure S9).

252

253 North America presents the most complex scenario as invasion occurred on both the east and  
254 west coasts, and shows patterns of cross-continent range expansions in both directions (Figure  
255 1D-E) (Puckett et al. 2016). We modeled the population tree of North America using the  
256 following populations: Udon Thani, Thailand (*SE Asia*), Nottingham, Great Britain (*Western*  
257 *Europe*), NYC, USA (*Expansion*), San Diego, USA (*Western North America*), and ran each  
258 topology independently adding in either Vancouver, Canada (*Expansion*) or Berkeley, USA  
259 (*Western North America*) to understand variation along the Pacific seaboard. Our previous work  
260 (Puckett et al. 2016) identified that brown rats in Vancouver had high proportions of European  
261 ancestry with some Asian ancestry; we interpreted this result as original invasion by the  
262 *Expansion* cluster with gene flow from neighboring Pacific coast populations that contained  
263 *Aleutian* or *Western North America* ancestry. Our best supported model showed admixture  
264 between the *Expansion* and *Western North America* clusters (Figure S10); surprisingly, the  
265 proportion from the *Expansion* cluster was 36% which was low compared to our previous result  
266 of ~90% European ancestry. The pattern in Berkeley, USA differed from that in Vancouver,  
267 where a model of population divergence between San Diego (*Western North America*) and  
268 Berkeley was observed prior to an admixture pulse from NYC (*Expansion*; Figure S10). This  
269 admixture pulse was estimated as 9% of the total Berkeley ancestry which was surprising given  
270 previous estimates of high proportions of European ancestry.

271

272

273 **DISCUSSION**

274 Our demographic modeling inferred that brown rats expanded from an ancestral range in  
275 northern Asia into eastern China, western North America, and SE Asia (Figures 1, 2, and S1).  
276 We included an unsampled ghost population in our model to represent this ancestral range in  
277 northern Asia. Brown rat fossils have been described from northern China and Mongolia (Smith  
278 and Xie 2008), and our range expansion results (Figure 1A) suggest eastern Russia as a possible  
279 part of the ancestral range. The Pacific cluster diverged earliest from the ancestral population  
280 4.8kya, and divergence of the *Aleutian* and *Western North America* clusters occurred 2.6kya  
281 (Figure 3, Table 1). Our cross-coalescence analysis (Figure S5C) suggested that divergence  
282 between these clusters may be as recent as 100 generations ago, which would explain why the  
283 patterns of change in  $N_e$  were similar over time. These results also suggest an explanation for the  
284 wide HPD estimates for these clusters in our demographic model (Table 1). We emphasize that  
285 the divergence of these clusters does not identify the timing of the introduction to the Aleutian  
286 Archipelago or the Pacific coast of North America where samples were collected. The historic  
287 record indicates rats were moved to the Aleutian Archipelago by Russian fur traders in the 1780s  
288 (Black 1983). Our regional population model suggested a scenario with gene flow from a  
289 population in eastern Russia into Adak Island (Figure S6), thereby suggesting two introductions  
290 of rats onto Adak. Our results suggest that more work is needed to understand invasion patterns  
291 of rats into western North America from eastern Asia. Specifically by incorporating both more  
292 sites and ancient samples, demographic models could estimate divergence times to differentiate  
293 between models of contemporary or historic movement of rats; this question is particularly  
294 interesting because human migration into the region occurred approximately 36kya (Moreno-  
295 Mayar et al. 2018). Thus, when rats first moved across Beringia remains an open question.

296

297 We estimated that the expansion across Asia was rapid and recent. Our modeling supported an  
298 independent expansion into *Eastern China* from the ancestral range 554 years ago (Figure 3A,  
299 Table 1). Given the eastern location of Harbin, China (where this lineage was sampled), we felt  
300 that it was reasonable to assume this was an independent expansion instead of part of the broader  
301 southern expansion into SE Asia (Figures 1A and 3A). Interestingly, the Harbin population  
302 contains high mitochondrial diversity, with the most divergent clades estimated to 96kya (HPD:  
303 70-128kya) (Puckett et al. 2018). This high mitochondrial diversity may reflect movement from  
304 multiple ancestral populations into the eastern portion of the range prior to recombination  
305 creating a unique nuclear genomic signature for the lineage.

306

307 We estimated that the *SE Asia* cluster diverged from the ancestral population 0.538kya (1477  
308 AD, Figure 3, Table 1). The timing of this divergence immediately raises the question of why  
309 rats did not expand sooner, as overland trade between China and SE Asia was established by the  
310 500s AD (Lieberman 2009); maritime trade between these regions and the Indian Ocean basin  
311 was established before the 900s AD (Heng 2009). A partial explanation may be due to the  
312 intersection of climate and human demography across eastern Asia. The Medieval Climate  
313 Anomaly (850-1250 AD) aided agricultural expansion and human demographic growth in China,  
314 specifically prompting urban centers to expand outward at a time of human movement from  
315 northern arid lands to more agriculturally productive lands in the south (see references within  
316 Lieberman 2009). However, the end of this climatic period resulted in drought, famine, political  
317 instability, and ultimately human demographic contractions in both China and SE Asia; fortunes  
318 reversed in the late 1400s to mid-1500s as the climate improved and populations expanded again



319 (Lieberman 2009). We hypothesize that this southward human demographic expansion  
320 facilitated the range expansion of brown rats, which explains the clinal pattern of ancestry from  
321 northern China across southern China into SE Asia that Zeng *et al.* (2018) observed. Thus, the  
322 founding of new agrarian communities and increasing inter-connectedness with urban centers  
323 would serve as stepping-stones for rats to move from northern China to SE Asia during the two  
324 periods of human demographic expansion.

325  
326 Our results regarding an ancestral range in the north with southward expansion into SE Asia  
327 stand in marked contrast to a different study that identified brown rats in SE Asia as the ancestral  
328 population with a northward expansion (Zeng et al. 2018). Both analyses used coalescent  
329 modeling approaches but with four primary differences: independent datasets, mutation rates,  
330 generation time, and tree topology. To address variation in the mutation rate, we ran our global  
331 model with the mutation rate fixed to  $1.103 \times 10^{-9}$  as used by Zeng et al. (2018) and observed a  
332 decreased model fit than when we allowed the mutation rate to be estimated as part of the model;  
333 therefore, we reported the model using the estimated rate of  $9.34 \times 10^{-8}$ . Regarding the  
334 generation time, we converted generations to years using the estimate of 3 generations per year  
335 where Zeng et al. (2018) used 2 generations per year. Thus, if both papers estimated a divergence  
336 given the same number of generations, the estimate of 3 generations per year would make those  
337 estimates more recent in time and 2 generations per year would estimate the event further back in  
338 time. Without direct field observations of rat fecundity and how it may vary with resources or  
339 climate, we are unable to identify the exact dates and thus acknowledge that discrepancy  
340 between the papers.

341

342 While the factors above likely contributed to small differences between our results and that of  
343 Zeng et al. (2018), we think that the more substantial discrepancy results from the population  
344 tree topology. Specifically, Zeng and colleagues (2018) included admixed samples containing SE  
345 Asian ancestry (that were geographically located in southern China) within the northern China  
346 cluster. By grouping the mixed ancestry samples preferentially with the northern Asia cluster, the  
347 coalescent model was better supported when the SE Asia population was ancestral. This result  
348 was likely due to better model fit given that a small proportion of SE Asian alleles were within  
349 the northern Asia cluster. We believe their result was not due to the true history of the  
350 populations but can instead be attributed to artefacts introduced by inappropriate sample  
351 clustering. Finally, we observed that inclusion of an unsampled ancestral population improved  
352 our model fit. Unsampled populations can influence parameter estimates of  $N_e$  and migration  
353 rates and has been shown to improve or at least not harm parameter estimation within the full  
354 model (Beerli 2004). Adding an unsampled population to our model was important given the  
355 limited number of chromosomes genotyped, as large sample sizes decrease the effect of  
356 unsampled populations on parameter estimates (Slatkin 2005).

357  
358 We estimated a rapid range expansion from SE Asia into Europe via the Middle East (Table 1).  
359 There was concordance between the phylogeographic patterns in our results and those of Zeng  
360 and colleagues (2018); however, we estimated the divergence time into the Middle East 538  
361 years ago (Table 1) and they 3,100 years ago (2,066 years when using 3 generations per year).  
362 These discrepancies were likely due to how population size and divergence time interact in  
363 coalescent models; specifically, we observed greatly improved model fit when including an  
364 ancestral population rate change parameter ( $R_{\text{Ancestral}}$ ; Appendix 1). It was unsurprising that our

365 model also estimated significantly smaller lineage specific  $N_e$ . Our estimate of  $N_e$  in NYC, USA  
366 (211 individuals; *Expansion* cluster; Table 1) was similar to an independent analysis of rats  
367 across NYC that estimated  $N_e$  of 260 individuals (Combs et al. 2018); therefore, we have high  
368 confidence in our model estimates of  $N_e$ , and believe that the pattern of population size change  
369 from the MSMC analysis was informative even if the exact estimates were high. Finally, we  
370 estimated that the *Expansion* cluster diverged from *Western Europe* around 1494 AD (Table 1).  
371 This estimate was much older than that of the historic record (Armitage 1993) and either  
372 indicates limits to parameter estimation for recent divergence events or an area for improvement  
373 within our model.

374

#### 375 *Ancestral population size*

376 We observed that  $N_e$  steadily declined in both the Pacific and Ancestral range populations  
377 around 150kya and 50kya, respectively (Figure 2). These declines began prior to the Last Glacial  
378 Maximum (22 – 18kya), a climatic period when populations of many species declined due to  
379 range contractions and/or shifts. More recent increasing population size appears related to the  
380 demographic and geographic range expansion mediated by rats commensal relationship with  
381 humans instead of climatic events alone.

382

#### 383 *Range expansion via human-mediated movements*

384 Our results identified that the global range expansion of rats occurred recently (1470s AD) and  
385 rapidly from SE Asia into Europe via the Middle East and was likely linked by maritime trade  
386 between those regions. This stands in marked contrast to previous assumptions that brown rats  
387 were transported westward along the Silk Road through central Asia into Europe. This is

388 counterintuitive as overland trade routes from central China to Persia were established 2.1kya  
389 (105 BC) and goods reached Rome by 46 BC (Tucker 2015). The Silk Road passed through part  
390 of the native range of brown rats, unlike black rats that originated on the Indian subcontinent  
391 (Aplin et al. 2011). Assuming that rats evolved their commensal relationship with humans prior  
392 to their global range expansion, as observed with house mouse (Suzuki et al. 2013), the  
393 availability of cities, road networks, and a flow of merchants naturally suggests a way to expand  
394 westward. The Silk Road may have not been the route for expansion due to the limited distance  
395 that merchants traveled along the route, as goods went further than the caravans containing the  
396 resources rats would need for survival (Tucker 2015). Further, high aridity and lack of water  
397 sources may have limited rat movement via the Silk Road. Yet this does not preclude the idea  
398 that brown rats may have expanded westward via Silk Road cities and were then extirpated due  
399 to the collapse of those cities during changing geo-politics and shifts towards maritime trade  
400 (Tucker 2015). We instead suggest that pulses of southward human demographic expansion from  
401 northern China during favorable climatic conditions enabled the expansion of rats into SE Asia  
402 from which they expanded westward. This hypothesis was supported by our range expansion  
403 models (Figure 1) showing westward movement from the Middle East into central Europe, then  
404 expansion in all directions across Europe. We present this historical narrative as a hypothesis  
405 supported by our demographic model, but also to stimulate interest in further study by historians  
406 and zooarchaeologists to examine the historical expansion of this globally important invader.

407

## 408 **MATERIALS and METHODS**

409 *Whole genome sequencing and datasets*

410 We selected 10 individuals for whole genome sequencing: two each representing evolutionary  
411 clusters within *SE Asia* (Philippines and Cambodia), *Northern Europe* (Sweden and  
412 Netherlands), *Western Europe* (England and France), and *Expansion* (New York, USA), and one  
413 sample each from the *Aleutian Islands* and *Western North America* (Table S1, Figure 2B). We  
414 generated paired-end reads for each sample (4ng RNase treated genomic DNA) by sequencing  
415 on an Illumina HiSeq 2500 at the New York Genome Center. Initial bioinformatics were  
416 completed by the New York Genome Center where genomes were mapped to the Rnor\_5.0.75  
417 reference (Gibbs et al. 2004) using BWA-MEM v0.7.8 (Li and Durbin 2010). Then, duplicates  
418 were marked using Picard Tools v1.122 and indels were realigned with the GATK v3.4.0  
419 IndelRealigner (McKenna et al. 2010). We sorted and indexed BAM files using SAMTOOLS  
420 v1.3.1 (Li et al. 2009). Data for these 10 genomes are available on the NCBI SRA BioProject  
421 PRJNA344413 (Puckett et al. 2018).

422  
423 We combined these 10 new WGS sequences with three existing datasets (Table S1) depending  
424 on the analysis. Specifically, we downloaded whole genomes from 11 brown rats and one black  
425 rat (*R. rattus*) collected in Harbin, China (ENA ERP001276), although to not bias estimates with  
426 unequal sample sizes we ran analyses using only Rnor13 and Rnor14 (Deinum et al. 2015) which  
427 were randomly selected. We downloaded 54 low-depth WGS brown rats collected in cities  
428 across Russia, China, and Iran (Beijing Institute of Genomics BioProject CRA000345,  
429 accessions: CRR021172 – CRR021339) (Zeng et al. 2018). Two of these samples (Iran5 and  
430 Iran9) were used in WGS analyses, whereby we mapped the raw reads to the Rnor\_5 reference  
431 with Bowtie v2 (Langmead and Salzberg 2012) using the default parameters, then sorted and  
432 indexed in SAMTOOLS. All 54 genomes were mapped to the Rnor\_6 reference with Bowtie v2,

433 sorted and indexed using SAMTOOLS, then had a set of 32k SNPs extracted using a position list  
434 in SAMTOOLS to make the data comparable to genotypes from 326 brown rats collected from  
435 around the globe (Puckett et al. 2018). Using these data sources, we created four datasets which  
436 varied in input samples and processing depending on the resultant analysis; we describe the input  
437 data and analyses in detail below.

438

### 439 *Patterns of Range Expansion*

440 We explored the geographic patterns of the global range expansion using the directionality index  
441 (Peter and Slatkin 2013) calculated from the site frequency spectra (SFS). The directionality  
442 index identifies the expected geographic location that acted as the center of a range expansion  
443 event. Where alternative tree topologies may be tested with demographic models to identify the  
444 one with the highest likelihood to the observed data.

445

446 This analysis utilized the combined ddRAD-Seq genotypes from Puckett et al (2018) and WGS  
447 data from Zeng et al. (2018) at 32k SNPs. We removed sampling sites represented by a single  
448 individual for a final data set containing 276 individuals from 45 locations. The VCF was  
449 converted into PLINK format, then imported into the *rangeExpansion* package for R (Peter and  
450 Slatkin 2013). We calculated the directionality index,  $\psi$ , for all population pairs using the  
451 `get.all.psi` function. To determine significance, we calculated the standard error of the upper  
452 triangle of the pairwise  $\psi$  matrix excluding the diagonal, thereby allowing us to calculate the Z-  
453 score for each population. For each region of interest, we plotted data for each pair of  
454 populations where the absolute Z-score was greater than 5 and visually assessed the geographic  
455 patterns of source and sink populations.

456

457 *Estimates of  $N_e$  Through Time*

458 We estimated the change in effective population size over time in each evolutionary cluster using  
459 MSMC2 (Schiffels and Durbin 2014). To call variants, we used SAMTOOLS mpileup across all  
460 samples (10 WGS genomes sequenced here and two Chinese genomes) with a minimum  
461 mapping quality of 18 and the coefficient to downgrade mapping qualities for excessive  
462 mismatches at 50. We then utilized the variant calling in BCFTOOLS v1.3 with the consensus  
463 caller and excluded indels which limited the dataset to bi-allelic SNPs, before pipping the output  
464 to the authors' bamCaller.py script that produced per chromosome masks and VCF files for each  
465 individual. As there was not a brown rat reference panel, we phased the 12 individuals plus two  
466 inbred lines (SS/Jr and WKY/NHsd; NCBI SRA accessions ERR224465 and ERR224470,  
467 respectively (Atanur et al. 2013)) for each of the 20 autosomes using fastPHASE v1.4.8 (Scheet  
468 and Stephens 2006). We generated genome-wide masks for each chromosome using SNPable (Li  
469 2009), then converted to a bed file with the makeMappabilityMask.py script. Finally, we used  
470 the generate\_multihetsep.py script to create the MSMC2 input files before running the program  
471 within and between population clusters. Specifically, we estimated change in  $N_e$  over time for  
472 each of the seven evolutionary clusters using two haplotypes for the *Aleutian* and *Western North*  
473 *American* clusters and four haplotypes for each other cluster. We also estimated the proportion of  
474 population divergence over time using the cross-population analysis, and combined results from  
475 individual populations with the cross-population analysis using the combineCrossCoal.py script  
476 provided.

477

478 *WGS Demographic Modeling*

479 We inferred the demographic history of rats by modeling alternative scenarios that compared the  
480 observed and expected site frequency spectra (SFS) for each evolutionary cluster. We combined  
481 the 10 genomes sequenced in this study, two genomes from Harbin, China, and two genomes  
482 from Mahmudabad, Iran (Table S1). We limited SNP calling to sites observed in 10 of 12  
483 genomes (-minInd; excluding those from Iran which had lower depth of coverage), to the 20  
484 autosomes, and to bases that had a minimum mapping quality (-minmapq) of 30 and minimum Q  
485 score (-minQ) of 20 using ANGSD v0.915 (Korneliussen et al. 2014). We estimated genotype  
486 likelihoods using the function implemented in SAMTOOLS (-GL 1) (Li et al. 2009). The *R.*  
487 *rattus* individual from China served as the outgroup allowing for identification of ancestral and  
488 derived alleles; then we calculated a folded SFS for each pairwise evolutionary cluster in  
489 ANGSD.

490  
491 Given the large number of evolutionary clusters to model, we first modeled the relationship  
492 between *Eastern China*, *SE Asia*, *Aleutian*, and *Western North America* by comparing five four-  
493 population models and five five-population models that included an unsampled population  
494 (Figure S3; Appendix 2). The best supported scenario (Model 6 in Figure S3) had a topology that  
495 included an ancestral unsampled ghost population with independent divergence of *Eastern*  
496 *China*, *SE Asia*, and the Pacific clusters. We then modeled four populations of a five-tree  
497 topology between the Middle East, *SE Asia*, *Northern Europe*, *Western Europe*, and the  
498 *Expansion*. Our previous work on brown rat phylogeography suggested that rats expanded into  
499 Europe from SE Asia (Puckett et al. 2016) and Zeng et al (2018) showed that the Middle East  
500 served as an intermediary point between SE Asia and Europe; thus, we tested the topology  
501 between the three European clusters (Appendix 2). The best supported scenario (Figure S4) had



502 an initial divergence of *Western Europe* from the Middle East, with *Northern Europe* and the  
503 *Expansion* diverging independently. For initial testing models, we did not allow population size  
504 to change through time, and we set the mutation rate at  $2.5 \times 10^{-8}$  mutations per generation.

505  
506 The best supported sub-models were concordant with the range expansion results; thus, we  
507 combined the topologies into a nine-population model. We tested this global model with no  
508 within lineage change in  $N_e$ , as well as allowing  $N_e$  to vary for both tip and ancestral branches  
509 (Appendix 1). Unlike in the sub-models described above, we estimated the mutation rate  
510 parameter within the model. We used three generations per year to convert parameter estimates;  
511 all time calculations were done since 2015.

512  
513 We ran 50 iterations of the nine-population model in fastsimcoal2 v2.6.0.3, then identified the  
514 iteration with the highest estimated likelihood. Using these point estimates, we generated 500  
515 samples of pairwise SFS each containing 50,000 markers that served as pseudo-observed data for  
516 estimating parameter ranges under the best supported model. We calculated the 90% highest  
517 probability density (HPD) from these 500 datasets using the *HDInterval* v0.1.3 package  
518 (Meredith and Kruschke 2016) in R.

519  
520 *ddRAD-Seq Demographic Modeling*

521 While our WGS had many more loci, there was limited geographic representation, as well as  
522 fewer individuals sampled; therefore, we built regional models from the ddRAD-Seq dataset to  
523 explore additional population tree topologies. We estimated the SFS of each population in  
524 ANGSD using the reference aligned Illumina reads instead of the previously called SNPs.

525  
526 We built regional models within the evolutionary clusters for eastern Asia/Pacific, SE Asia,  
527 Northern Europe, and Western Europe. We used this reductive approach to limit the number of  
528 parameters being estimated. Within each region, we compared topologies between populations  
529 suggested by previous population structure analyses (Puckett et al. 2016). We used the same  
530 fastsimcoal2 run parameters as described above; however, we did not create pseudo-observed  
531 datasets for parameter estimation, unless noted, as our interest was in topology. A secondary  
532 reason we did not further explore population parameters within the regions was that we observed  
533 these datasets tended to overestimate divergence times, likely due to unsorted variation  
534 remaining within populations until coalescence with the unsampled ancestral population. Finally,  
535 we investigated population topology and admixture proportions in Vancouver, Canada and  
536 Berkeley, USA since each site was identified as admixed in our previous analysis (Table S2).

537

### 538 *Chromosomal Diversity*

539 Using the genotypes from the WGS data created with ANGSD, we estimated heterozygosity on  
540 each chromosome for each individual. We exported the genotype likelihoods into PLINK v1.9  
541 (Purcell et al. 2007; Chang et al. 2015) and estimated heterozygosity (--het) on each  
542 chromosome.

543

### 544 **DATA ACCESS**

545 Data for whole genome sequences from 10 brown rats available on NCBI SRA BioProject  
546 PRJNA344413.

547

548 **ACKNOWLEDGEMENTS**

549 We thank Joshua Schraiber and two anonymous reviewers for comments that improved the  
550 manuscript. This work was funded by National Science Foundation grants DEB 1457523 and  
551 MRI 1531639 to JM-S. The mammal collections at the University of Alaska Museum of the  
552 North, University of California- Berkeley Museum of Vertebrate Zoology, the Burke Museum at  
553 the University of Washington, and the Museum of Texas Tech University also graciously  
554 provided tissue samples.

555

556 **REFERENCES**

- 557 Aplin KP, Suzuki H, Chinen AA, Chesser RT, ten Have J, Donnellan SC, Austin J, Frost A, Gonzalez JP,  
558 Herbretreau V et al. 2011. Multiple geographic origins of commensalism and complex dispersal  
559 history of black rats. *PLoS ONE* **6**: e26357.
- 560 Armitage P. 1993. Commensal rats in the New World, 1492-1992. *Biologist* **40**: 174-178.
- 561 Atanur Santosh S, Diaz Ana G, Maratou K, Sarkis A, Rotival M, Game L, Tschannen Michael R, Kaisaki  
562 Pamela J, Otto Georg W, Ma Man Chun J et al. 2013. Genome Sequencing Reveals Loci under  
563 Artificial Selection that Underlie Disease Phenotypes in the Laboratory Rat. *Cell* **154**: 691-703.
- 564 Beerli P. 2004. Effect of unsampled populations on the estimation of population sizes and migration  
565 rates between sampled populations. *Molecular Ecology* **13**: 827-836.
- 566 Black L. 1983. Record of maritime disasters in Russian America, Part One: 1741-1799. In *Proceedings of*  
567 *the Alaska Maritime Archaeology Workshop, May 17-19, 1983*, Vol Alaska Sea Grant Report No.  
568 83-9. University of Alaska- Fairbanks, Sitka, AK.
- 569 Chang CC, Chow CC, Tellier LCAM, Vattikuti S, Purcell SM, Lee JJ. 2015. Second-generation PLINK: rising  
570 to the challenge of larger and richer datasets. *GigaScience* **4**: 7.
- 571 Combs M, Puckett EE, Richardson J, Mims D, Munshi-South J. 2018. Spatial population genomics of the  
572 brown rat (*Rattus norvegicus*) in New York City. *Molecular Ecology* **27**: 83-98.
- 573 Deinum EE, Halligan DL, Ness RW, Zhang Y-H, Cong L, Zhang J-X, Keightley PD. 2015. Recent evolution in  
574 *Rattus norvegicus* is shaped by declining effective population size. *Molecular Biology and*  
575 *Evolution* **32**: 2547-2558.
- 576 Eryvynck A. 2002. Sedentism or urbanism? On the origin of the commensal black rat (*Rattus rattus*). In  
577 *Bones and the man: Studies in honour of Don Brothwell*, (ed. K Dobney, T O'Connor), pp. 95-109.  
578 Oxbow Books, Oxford.
- 579 Gibbs RA Weinstock GM Metzker ML Muzny DM Sodergren EJ Scherer S Scott G Steffen D Worley KC  
580 Burch PE et al. 2004. Genome sequence of the Brown Norway rat yields insights into mammalian  
581 evolution. *Nature* **428**: 493-521.
- 582 Harper GA, Bunbury N. 2015. Invasive rats on tropical islands: Their population biology and impacts on  
583 native species. *Global Ecology and Conservation* **3**: 607-627.
- 584 Heng D. 2009. *Sino-Malay Trade and Diplomacy from the Tenth through the Fourteenth Century*. Ohio  
585 University Press, Athens, USA.
- 586 Himsworth CG, Parsons KL, Jardine C, Patrick DM. 2013. Rats, cities, people, and pathogens: a systematic  
587 review and narrative synthesis of literature regarding the ecology of rat-associated zoonoses in  
588 urban centers. *Vector borne and zoonotic diseases (Larchmont, NY)* **13**: 349-359.
- 589 Johnson MTJ, Munshi-South J. 2017. Evolution of life in urban environments. *Science* **358**.
- 590 Jones HP, Holmes ND, Butchart SHM, Tershy BR, Kappes PJ, Corkery I, Aguirre-Muñoz A, Armstrong DP,  
591 Bonnaud E, Burbidge AA et al. 2016. Invasive mammal eradication on islands results in  
592 substantial conservation gains. *Proceedings of the National Academy of Sciences* **113**: 4033-  
593 4038.
- 594 Korneliusen TS, Albrechtsen A, Nielsen R. 2014. ANGSD: Analysis of Next Generation Sequencing Data.  
595 *BMC Bioinformatics* **15**: 1-13.
- 596 Lack J, Hamilton M, Braun J, Mares M, Van Den Bussche R. 2013. Comparative phylogeography of  
597 invasive *Rattus rattus* and *Rattus norvegicus* in the U.S. reveals distinct colonization histories  
598 and dispersal. *Biological Invasions* **15**: 1067-1087.
- 599 Langmead B, Salzberg SL. 2012. Fast gapped-read alignment with Bowtie 2. *Nature Methods* **9**: 357-359.
- 600 Li H. 2009. SNPable Regions. <http://lh3lh3.users.sourceforge.net/snpable.shtml>.
- 601 Li H, Durbin R. 2010. Fast and accurate long-read alignment with Burrows-Wheeler transform.  
602 *Bioinformatics* **26**: 589-595.

- 603 Li H, Handsaker B, Wysoker A, Fennell T, Ruan J, Homer N, Marth G, Abecasis G, Durbin R. 2009. The  
604 Sequence Alignment/Map format and SAMtools. *Bioinformatics* **25**: 2078-2079.
- 605 Lieberman V. 2009. *Strange Parallels: Southeast Asia in Global Context, c. 800-1830*. Cambridge  
606 University Press, Cambridge, Great Britain.
- 607 McKenna A, Hanna M, Banks E, Sivachenko A, Cibulskis K, Kernytzky A, Garimella K, Altshuler D, Gabriel  
608 S, Daly M et al. 2010. The Genome Analysis Toolkit: A MapReduce framework for analyzing next-  
609 generation DNA sequencing data. *Genome Research* **20**: 1297-1303.
- 610 Meredith M, Kruschke J. 2016. Highest (Posterior) Density Intervals. CRAN, CRAN.
- 611 Moreno-Mayar JV, Potter BA, Vinner L, Steinrücken M, Rasmussen S, Terhorst J, Kamm JA, Albrechtsen  
612 A, Malaspinas A-S, Sikora M et al. 2018. Terminal Pleistocene Alaskan genome reveals first  
613 founding population of Native Americans. *Nature* **553**: 203.
- 614 Peter BM, Slatkin M. 2013. Detecting range expansions from genetic data. *Evolution* **67**: 3274-3289.
- 615 Pimentel D, Lach L, Zuniga R, Morrison D. 2000. Environmental and Economic Costs of Nonindigenous  
616 Species in the United States. *BioScience* **50**: 53-65.
- 617 Puckett EE, Micci-Smith O, Munshi-South J. 2018. Genomic analyses identify multiple Asian origins and  
618 deeply diverged mitochondrial clades in inbred brown rats (*Rattus norvegicus*). *Evolutionary  
619 Applications* **11**: 718-726.
- 620 Puckett EE, Park J, Combs M, Blum MJ, Bryant JE, Caccone A, Costa F, Deinum EE, Esther A, Himsworth  
621 CG et al. 2016. Global population divergence and admixture of the brown rat (*Rattus  
622 norvegicus*). *Proceedings of the Royal Society B: Biological Sciences* **283**: 1-9.
- 623 Purcell S, Neale B, Todd-Brown K, Thomas L, Ferreira MAR, Bender D, Maller J, Sklar P, de Bakker PIW,  
624 Daly MJ et al. 2007. PLINK: A tool set for whole-genome association and population-based  
625 linkage analyses. *The American Journal of Human Genetics* **81**: 559-575.
- 626 Scheet P, Stephens M. 2006. A fast and flexible statistical model for large-scale population genotype  
627 data: Applications to inferring missing genotypes and haplotypic phase. *American Journal of  
628 Human Genetics* **78**: 629-644.
- 629 Schiffels S, Durbin R. 2014. Inferring human population size and separation history from multiple  
630 genome sequences. *Nature Genetics* **46**: 919-925.
- 631 Slatkin M. 2005. Seeing ghosts: the effect of unsampled populations on migration rates estimated for  
632 sampled populations. *Molecular Ecology* **14**: 67-73.
- 633 Smith AT, Xie Y. 2008. *A Guide to the Mammals of China*. Princeton University Press, Princeton, NJ.
- 634 Song Y, Lan Z, Kohn MH. 2014. Mitochondrial DNA phylogeography of the Norway rat. *PLoS ONE* **9**:  
635 e88425.
- 636 Suzuki H, Nunome M, Kinoshita G, Aplin KP, Vogel P, Kryukov AP, Jin ML, Han SH, Maryanto I, Tsuchiya K  
637 et al. 2013. Evolutionary and dispersal history of Eurasian house mice *Mus musculus* clarified by  
638 more extensive geographic sampling of mitochondrial DNA. *Heredity* **111**: 375-390.
- 639 Tucker J. 2015. *The Silk Road: China and the Karakorum Highway*. I.B.Tauris & Company, New York, USA.
- 640 Yalden DW. 2003. Mammals in Britain - A historical perspective. *British Wildlife* **14**: 243-251.
- 641 Zeng L, Ming C, Li Y, Su L-Y, Su Y-H, Otecko NO, Dalecky A, Donnellan S, Aplin K, Liu X-H et al. 2018. Out  
642 of Southern East Asia of the Brown Rat Revealed by Large-Scale Genome Sequencing. *Molecular  
643 Biology and Evolution* doi:10.1093/molbev/msx276.
- 644

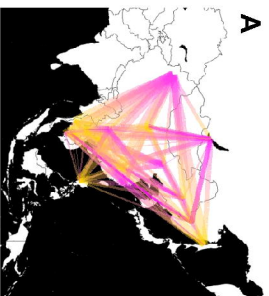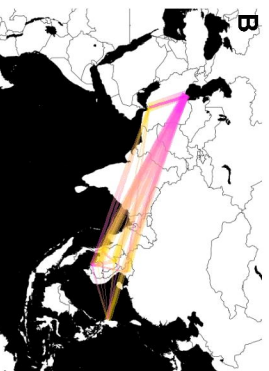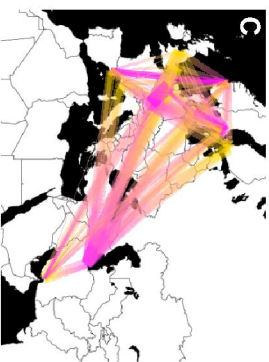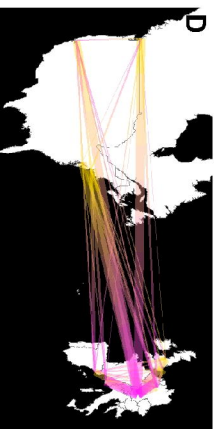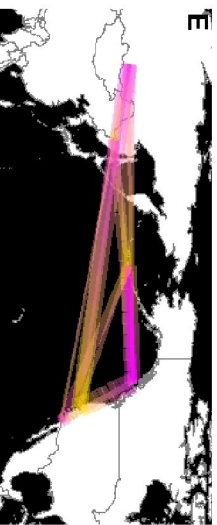

**Instantaneous  
Coalescent Rate**

$5 \times 10^6$

$5 \times 10^5$

$5 \times 10^4$

$5 \times 10^3$

$1 \times 10^2$

$5 \times 10^2$

$5 \times 10^3$

$5 \times 10^4$

**Years Ago**

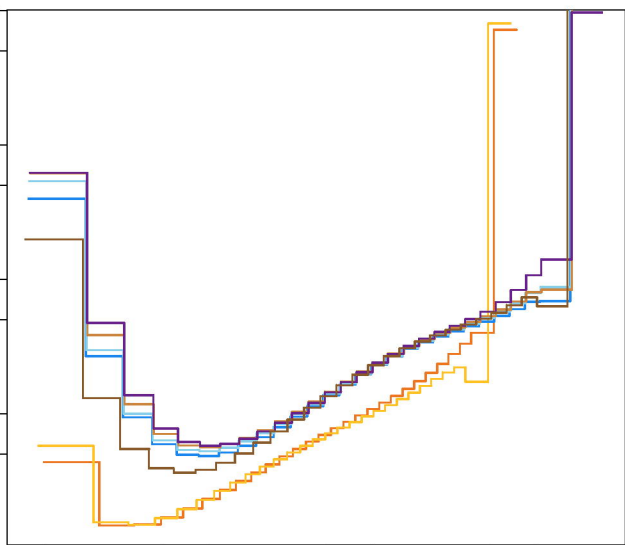

**A**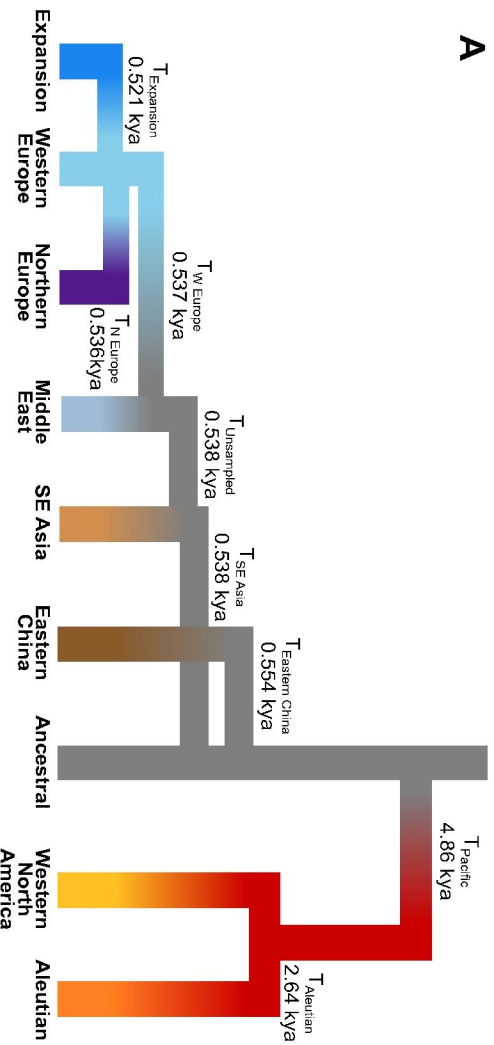**B**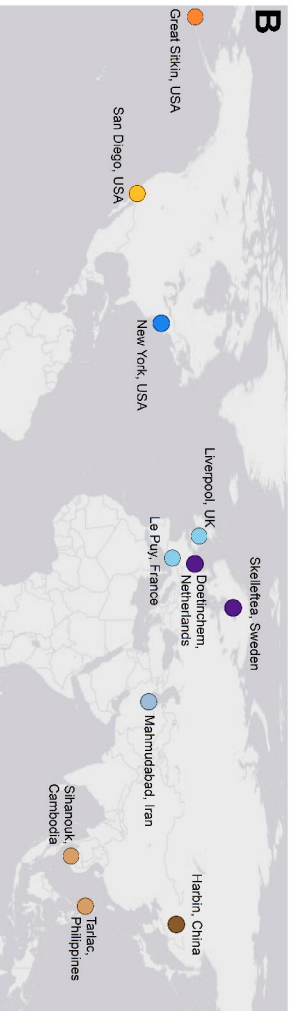

Source: https://www.biorxiv.org/content/10.1101/249862v2.full.pdf
